# Supplementary material
Source: MDPI journal article supplement (https://www.mdpi.com/2073-4468/13/2/36)
Supplement: s1 [file s1]

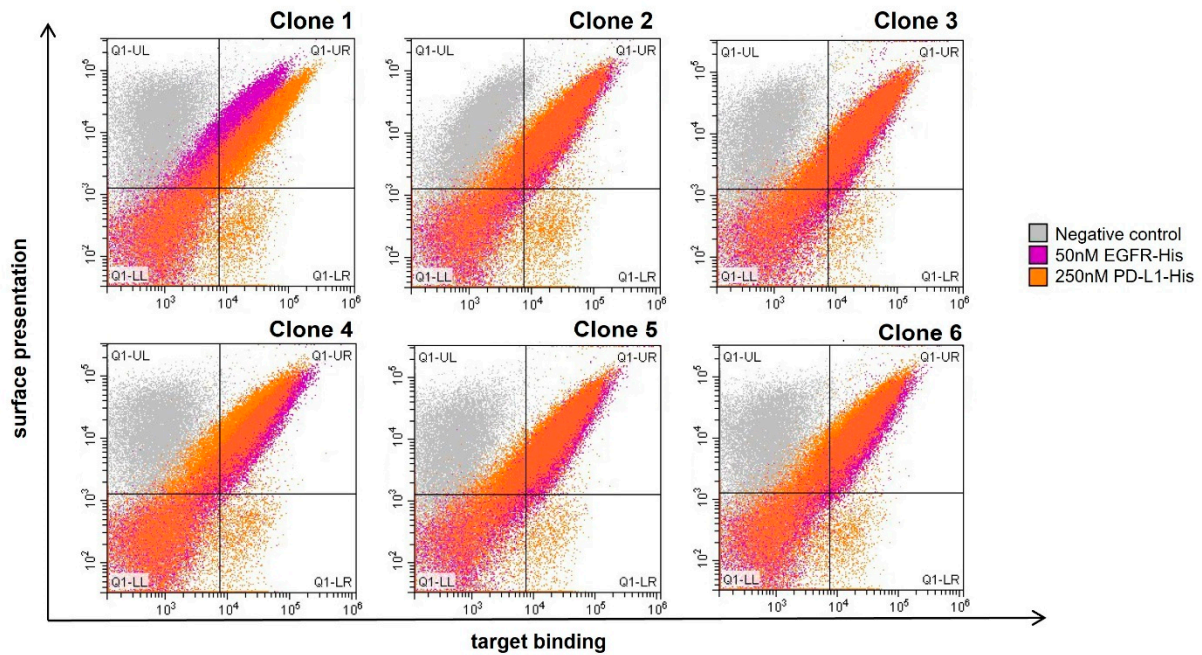

**Figure S1.** Flow cytometric analysis of six isolated yeast single clones after three consecutive rounds of FACS screening. Surface presentation is depicted on the y-axis utilizing the anti-human-Lambda PE-conjugated F(ab')<sub>2</sub> antibody, while EGFR-His<sub>6</sub> (purple) and PD-L1-His<sub>6</sub> (orange) binding is shown on the x-axis using the anti-6xHis AF647 antibody.

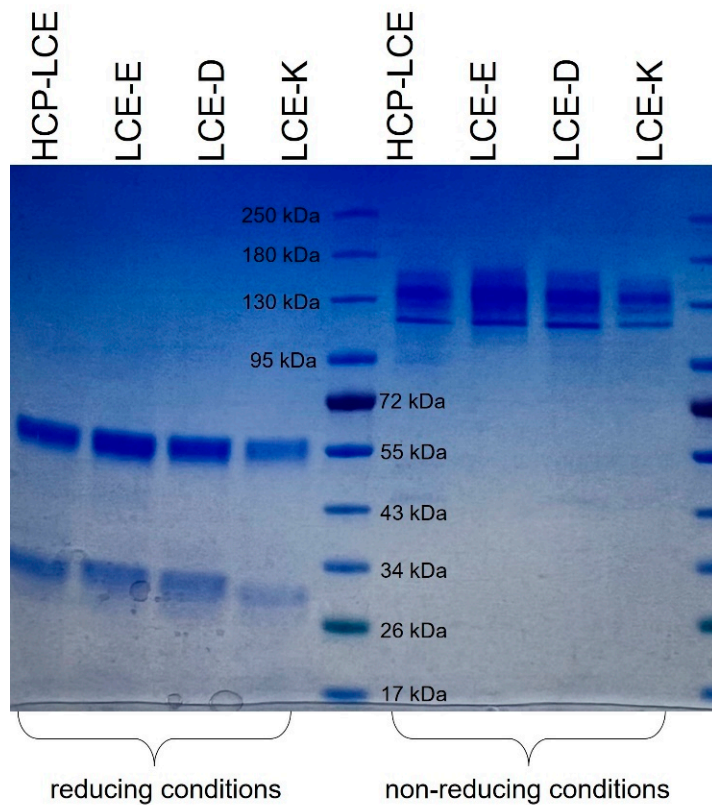

**Figure S2.** SDS-PAGE analysis of the wildtype Two-in-One antibody HCP-LCE and mutants LCE-E, LCE-D and LCE-K under reducing (left) and non-reducing conditions (right). As protein standard, Color Prestained Protein standard (New England Biolabs) was used.

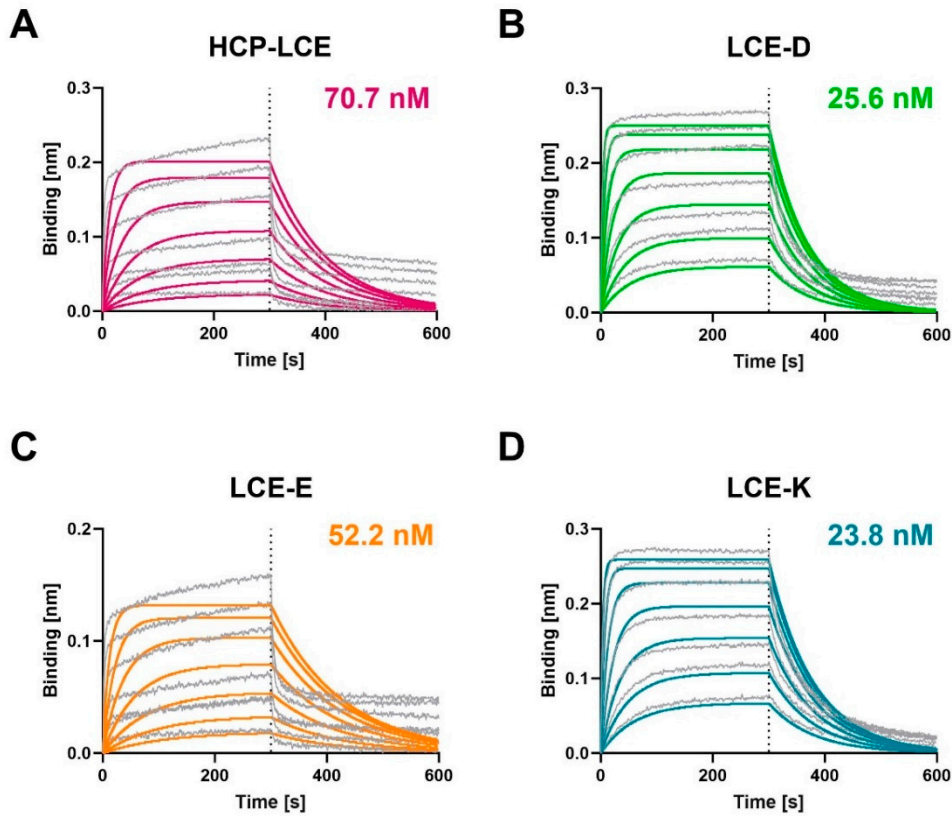

**Figure S3.** Characterization of PD-L1 binding of the HCP-LCE variants by BLI-measurements. BLI-measurements of (A) HCP-LCE, (B) LCE-D, (C) LCE-E and (D) LCE-K against PD-L1. The fit is depicted by the colored curves.

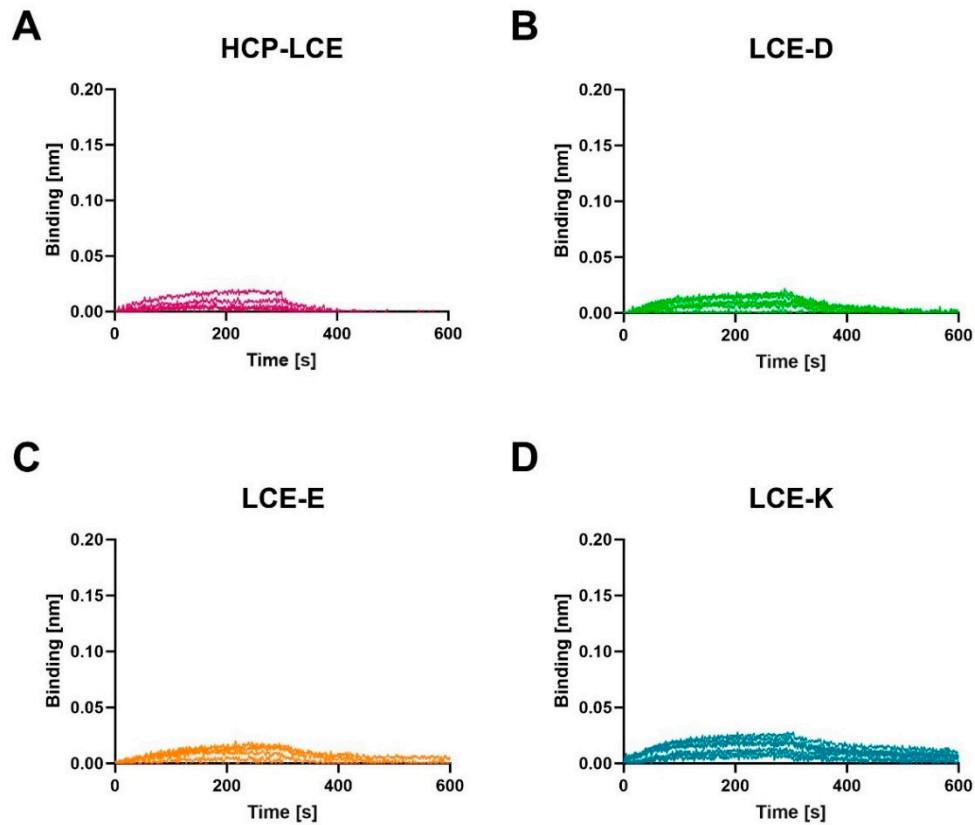

**Figure S4.** Characterization of (A) HCP-LCE, (B) LCE-D, (C) LCE-E and (D) LCE-K binding to a negative control protein by BLI-measurements.

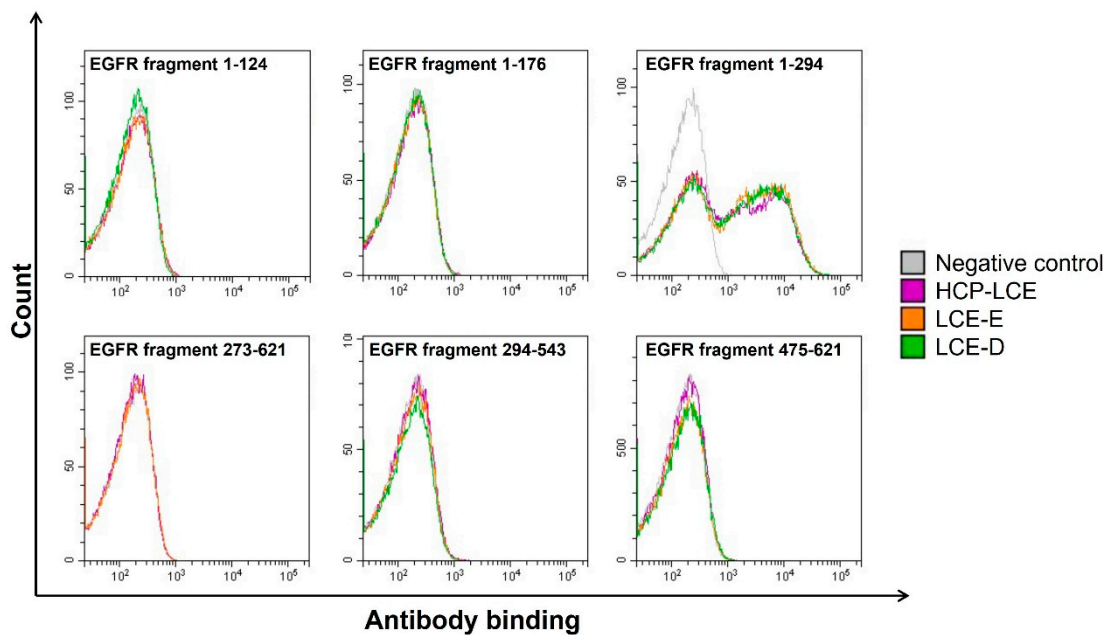

**Figure S5.** YSD-based EGFR epitope mapping. Binding of HCP-LCE (pink), LCE-E (orange) and LCE-D (green) to yeast cells expressing different truncated EGFR fragments was detected using the anti-human Fc PE-labelled antibody. Measurements

without antibody (grey) served as negative control. All antibodies target EGFR fragment 1-294.

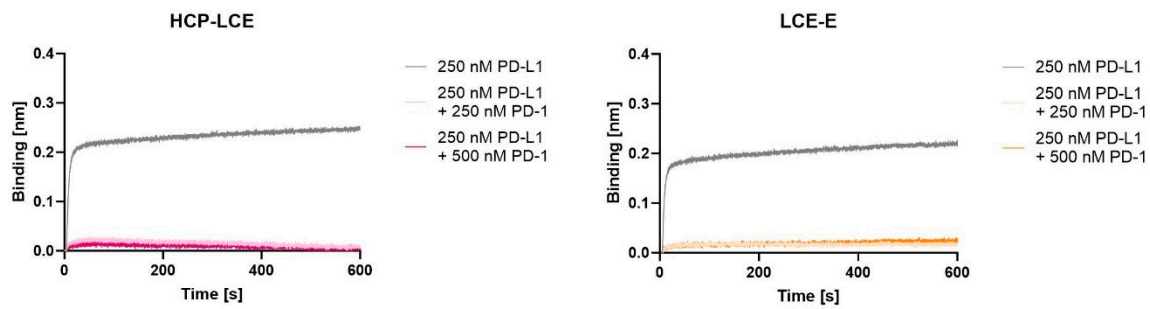

**Figure S6.** BLI-assisted PD-1 competition assay. HCP-LCE and LCE-E were loaded onto FAB2G biosensors and subsequently associated to PD-L1 pre-incubated with varying PD-1 concentrations. The antibodies do not target the PD-1/PD-L1 complex.

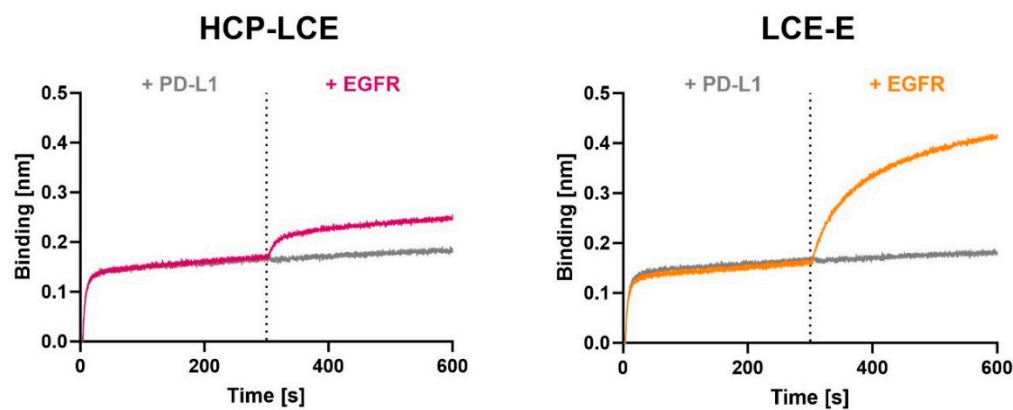

**Figure S7.** BLI-assisted simultaneous binding assay. One-armed variants of the antibodies HCP-LCE and LCE-E were loaded onto AHC biosensors and antigens were added stepwise, revealing simultaneous PD-L1 and EGFR binding.

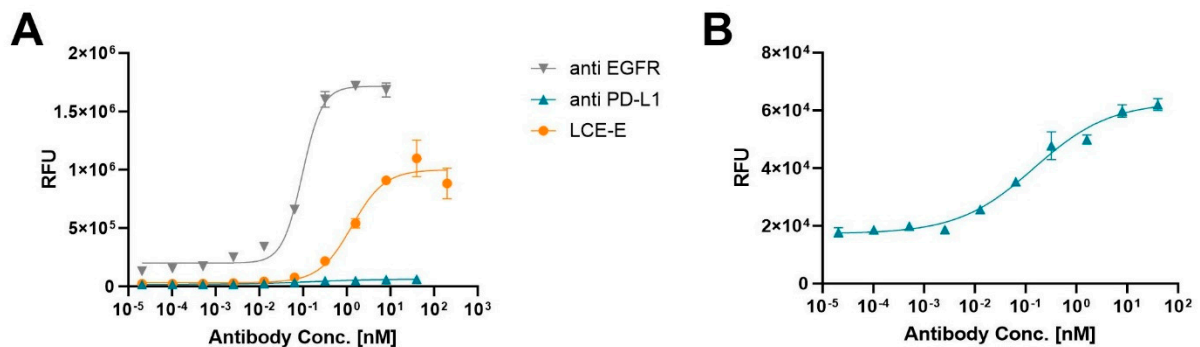



**Figure S8.** Cellular binding of a monospecific anti-EGFR (grey) and anti-PD-L1 antibody (blue) compared to LCE-E (orange) on EGFR/PD-L1 double positive A549 cells. B is a zoomed-in view of the graph shown in A.

**Cellular binding on EGFR/PD-L1 negative Jurkat cells**

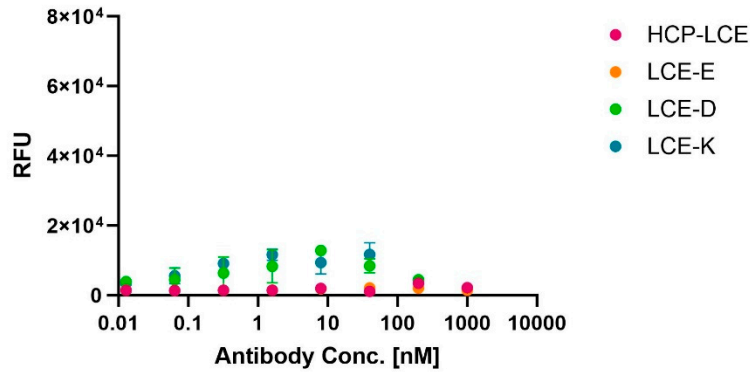

**Figure S9.** Cellular binding of the HCP-LCE variants on EGFR/PD-L1 double negative Jurkat cells. Cell titration of HCP-LCE (pink), LCE-E (orange), LCE-D (green) and LCE-K (blue) on Jurkat cells.

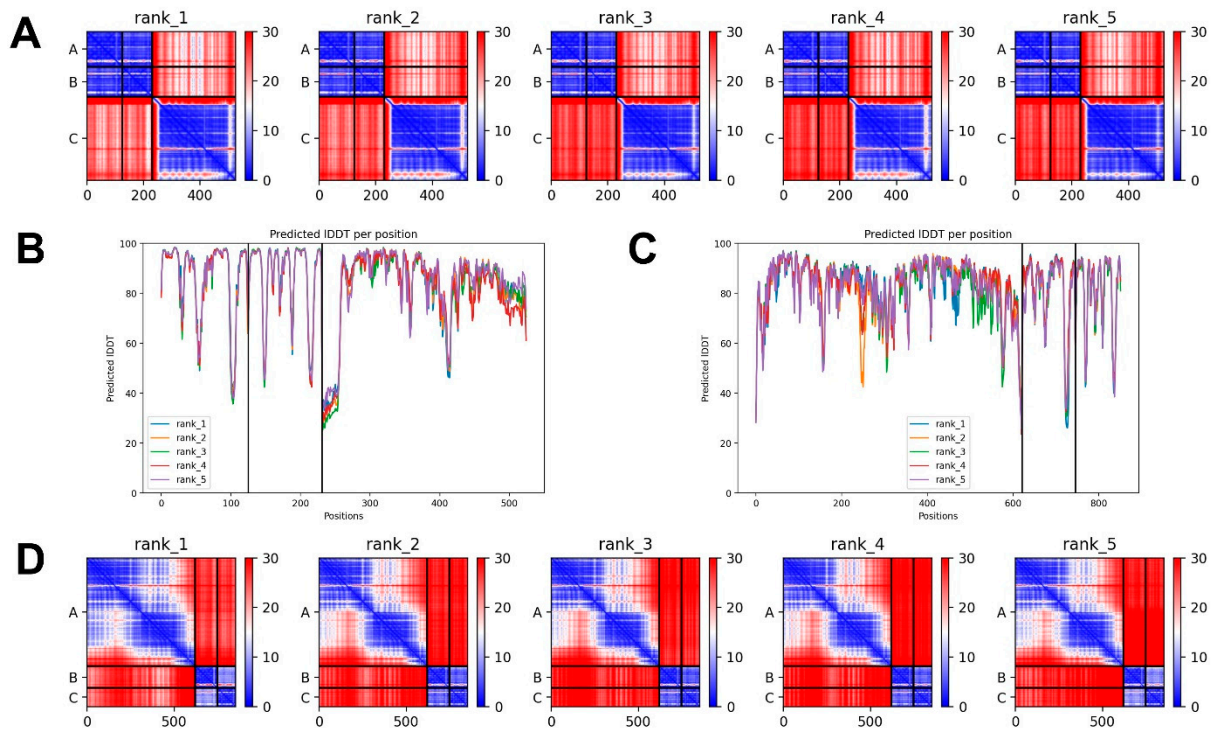

**Figure S10.** pLDDT and PAE plots generated by AlphaFold Multimer. (A) PAE plots of LCE-E and EGFR modelling, (B) pLDDT plot of LCE-E and EGFR modelling, (C) pLDDT plot of HCP-LCE and EGFR modelling, (D) PAE plots of HCP-LCE and EGFR modelling.

**Table S1.** Kinetic values calculated from switchSENSE® measurements.

| analyte | surface        | monitored interaction | ka [M <sup>-1</sup> s <sup>-1</sup> ] | Kd1 [s <sup>-1</sup> ] | Kd2 [s <sup>-1</sup> ] | KD1 [M]  | KD2 [M]  | relative dissociation amplitude 1 | relative dissociation amplitude 2 | t <sub>1/2</sub> [s] |
|---------|----------------|-----------------------|---------------------------------------|------------------------|------------------------|----------|----------|-----------------------------------|-----------------------------------|----------------------|
| HCP-LCE | PD-L1          | PD-L1                 | 4.42E+06                              | 1.87E-02               | 2.66E-04               | 4.23E-09 | 6.02E-11 | 0.603                             | 0.397                             | 90                   |
|         | EGFR and PD-L1 | EGFR                  | 5.08E+06                              | 1.04E-02               | 6.88E-05               | 2.05E-09 | 1.36E-11 | 0.795                             | 0.205                             | 95                   |
|         |                | PD-L1                 | 5.29E+06                              | 2.17E-02               | 5.34E-04               | 4.10E-09 | 1.01E-10 | 0.607                             | 0.393                             | 74                   |
|         | EGFR           | EGFR                  | 7.28E+06                              | 2.25E-02               | 3.19E-04               | 3.09E-09 | 4.39E-11 | 0.690                             | 0.310                             | 56                   |
| LCE-E   | PD-L1          | PD-L1                 | 9.27E+06                              | 1.79E-02               | 4.71E-04               | 1.94E-09 | 5.08E-11 | 0.436                             | 0.564                             | 269                  |
|         | EGFR and PD-L1 | EGFR                  | 7.39E+06                              | NA                     | 2.11E-04               | NA       | 2.86E-11 | NA                                | NA                                | 3283                 |
|         |                | PD-L1                 | 6.15E+06                              | 2.31E-02               | 4.85E-04               | 3.76E-09 | 7.88E-11 | 0.626                             | 0.374                             | 35                   |
|         | EGFR           | EGFR                  | 6.78E+06                              | 1.33E-04               | 1.06E-04               | 1.96E-11 | 1.56E-11 | 0.392                             | 0.608                             | 5982                 |

**Table S2.** Kinetic values calculated from RT-IC measurements.

| analyte | cell line | ka [M <sup>-1</sup> s <sup>-1</sup> ] | kd1 [s <sup>-1</sup> ] | kd2 [s <sup>-1</sup> ] | KD1 [M]  | KD2 [M]  | relative dissociation amplitude 1 | relative dissociation amplitude 2 | t <sub>1/2</sub> [s] |
|---------|-----------|---------------------------------------|------------------------|------------------------|----------|----------|-----------------------------------|-----------------------------------|----------------------|
| HCP-LCE | A431      | 1.37E+06                              | 3.97E-03               | 1.59E-04               | 2.90E-09 | 1.16E-10 | 0.316                             | 0.684                             | 1966                 |
|         |           | 2.81E+05                              | 3.97E-03               | 8.21E-05               | 1.41E-08 | 2.92E-10 | 0.229                             | 0.771                             | 5268                 |
|         |           | 1.66E+05                              | 5.18E-03               | 1.21E-04               | 3.12E-08 | 7.30E-10 | 0.159                             | 0.841                             | 4291                 |
|         | A549      | 6.70E+04                              | 3.28E-03               | 6.89E-05               | 4.89E-08 | 1.03E-09 | 0.172                             | 0.828                             | 7312                 |
|         |           | 4.31E+04                              | 4.65E-03               | 5.30E-05               | 1.08E-07 | 1.23E-09 | 0.177                             | 0.823                             | 9389                 |
| LCE-E   | A431      | 3.41E+04                              | 4.52E-03               | 4.17E-05               | 1.33E-07 | 1.23E-09 | 0.105                             | 0.895                             | 13960                |
|         |           | 4.89E+04                              | NA                     | 7.67E-05               | NA       | 1.57E-09 | 0.000                             | 1.000                             | 9035                 |
|         | A549      | 1.61E+04                              | NA                     | 2.47E-05               | NA       | 1.53E-09 | 0.000                             | 1.000                             | 28056                |
|         |           | 2.43E+04                              | 2.50E-03               | 4.71E-05               | 1.03E-07 | 1.93E-09 | 0.096                             | 0.904                             | 12573                |
